# Supplementary material for: Potential of Genome-Wide Studies in Unrelated Plus Trees of a Coniferous Species, Cryptomeria japonica (Japanese Cedar)
Source: Front Plant Sci. 2018 Sep 10;9:1322. doi: 10.3389/fpls.2018.01322 (PMC6141754; doi:10.3389/fpls.2018.01322)
Supplement: Supplementary file 2 [file Table_2.xlsx]

## Sheet: Table S2
	Table S2 Numbers of analyzed data and genotypes, and significance of genetic effect for the assessed traits.
	Breeding region	Trait	Number of data	Number of analyzed genotypes	Signficance test	F value or ∆D1,2	Reference
	Kanto	Height	6813	530	Likelihood ratio test	325.5***
		DBH	7100	535	Likelihood ratio test	416.5***
		Wood stiffness	2149	745	F test	19.3***	Mishima et al. (2011)
		Wood density	2149	745	F test	10.2***	Mishima et al. (2011)
		Male fecundity	18655	745	F test	42.4***	Tsubomura et al. (2013)
	Kyushu	Height	8955	432	Likelihood ratio test	1145.1***
		DBH	8958	432	Likelihood ratio test	1052.1***
		Wood stiffness	2662	714	Likelihood ratio test	98.1***
		Wood density	4632	627	Likelihood ratio test	268.0***
		Male fecundity	5024	559	F test	16.5***
	***: p < 0.001
